# Supplementary material
Source: PubMed Central journal article supplement (PMC2915815)
Supplement: 514674.f1.pdf [file 514674.f1.pdf]

**Supplementary Appendices**

**Table 1S: Urbanicity** - Relative risk ratios (RRRs) and 95% confidence interval (CI) from multinomial multivariable model (using BMI 18.5-24.9 kg/m<sup>2</sup> as the referent) regressing BMI classification on urbanicity with clustered robust standard errors (CRSE) of primary sampling units (PSUs), adjusted for gender, age strata, and income quintile, World Health Survey, 2002–2003.

**Table 2S: Sex** -Relative risk ratios (RRRs) and 95% confidence interval (CI) from multinomial multivariable model (using BMI 18.5-24.9 kg/m<sup>2</sup> as the referent) regressing BMI classification on male sex with clustered robust standard errors (CRSE) of primary sampling units (PSUs), adjusted for urbanicity, age strata, and income quintile, World Health Survey, 2002–2003.

**Table 3S: Income** - Relative risk ratios (RRRs) and 95% confidence interval (CI) from multinomial multivariable model (using BMI 18.5-24.9 kg/m<sup>2</sup> as the referent) regressing BMI underweight classification on income quintiles (using highest income quintile as the referent) with clustered robust standard errors (CRSE) of primary sampling units (PSUs), adjusted for urbanicity, age strata, and sex, World Health Survey, 2002–2003.

**Table 4S: Income** - Relative risk ratios (RRRs) and 95% confidence interval (CI) from multinomial multivariable model (using BMI 18.5-24.9 kg/m<sup>2</sup> as the referent) regressing BMI overweight classification on income quintiles (using highest income quintile as the referent) with clustered robust standard errors (CRSE) of primary sampling units (PSUs), adjusted for urbanicity, age strata, and sex, World Health Survey, 2002–2003.

**Table 5S: Income** - Relative risk ratios (RRRs) and 95% confidence interval (CI) from multinomial multivariable model (using BMI 18.5-24.9 kg/m<sup>2</sup> as the referent) regressing BMI obese classification on income quintiles (using highest income quintile as the referent) with clustered robust standard errors (CRSE) of primary sampling units (PSUs), adjusted for urbanicity, age strata, and sex, World Health Survey, 2002–2003.

*Socio-economic disparities in obesity and underweight*

**Table 1S: Urbanicity** - Relative risk ratios (RRRs) and 95% confidence interval (CI) from multinomial multivariable model (using BMI 18.5-24.9 kg/m<sup>2</sup> as the referent) regressing BMI classification on urbanicity with clustered robust standard errors (CRSE) of primary sampling units (PSUs), adjusted for gender, age strata, and income quintile, World Health Survey, 2002–2003.

|                             | <b>Underweight<br/>Relative Risk<br/>Ratio (RRR)<br/>95% Confidence<br/>Intervals<br/>(95%CI)</b> | <b>Overweight<br/>Relative Risk<br/>Ratio (RRR)<br/>95%<br/>Confidence<br/>Intervals<br/>(95%CI)</b> | <b>Obese<br/>Relative Risk<br/>Ratio (RRR)<br/>95%<br/>Confidence<br/>Intervals<br/>(95%CI)</b> | <b>No.<br/>Clusters</b> | <b>Sample<br/>Size</b> |
|-----------------------------|---------------------------------------------------------------------------------------------------|------------------------------------------------------------------------------------------------------|-------------------------------------------------------------------------------------------------|-------------------------|------------------------|
| Bangladesh <sup>a</sup>     | 1.01<br>(0.58-1.77)                                                                               | 0.75<br>(0.44-1.27)                                                                                  | 0.47<br>(0.14-1.56)                                                                             | 167                     | 803                    |
| Bosnia and<br>Herzegovina   | 1.19<br>(0.44-3.22)                                                                               | 1.36<br>(0.97-1.92)                                                                                  | <b>1.87*</b><br><b>(1.05-3.34)</b>                                                              | 112                     | 995                    |
| Brazil                      | <b>2.08**</b><br><b>(1.21-3.60)</b>                                                               | <b>1.25*</b><br><b>(1.01-1.56)</b>                                                                   | 0.79<br>(0.52-1.20)                                                                             | 242                     | 4147                   |
| Burkina Faso <sup>a</sup>   | 1.54<br>(0.75-3.18)                                                                               | 1.06<br>(0.73-1.53)                                                                                  | <b>4.88*</b><br><b>(1.17-20.32)</b>                                                             | 117                     | 1620                   |
| Chad                        | 0.97<br>(0.58-1.63)                                                                               | 0.97<br>(0.72-1.30)                                                                                  | 1.28<br>(0.74-2.20)                                                                             | 103                     | 3172                   |
| China                       | 0.73<br>(0.48-1.10)                                                                               | 1.08<br>(0.67-1.73)                                                                                  | 1.94<br>(0.84-4.43)                                                                             | 30                      | 3846                   |
| Comoros                     | 1.38<br>(0.82-2.31)                                                                               | 1.44<br>(0.96-2.15)                                                                                  | 1.74<br>(0.79-3.83)                                                                             | 49                      | 1622                   |
| Congo                       | 0.95<br>(0.48-1.87)                                                                               | 1.36<br>(0.88-2.09)                                                                                  | 2.83<br>(0.86-9.29)                                                                             | 108                     | 2061                   |
| Côte d'Ivoire               | 0.97<br>(0.65-1.44)                                                                               | 1.05<br>(0.82-1.35)                                                                                  | 1.18<br>(0.75-1.87)                                                                             | 172                     | 2651                   |
| Croatia                     | 2.56<br>(0.77-8.48)                                                                               | 1.03<br>(0.72-1.48)                                                                                  | 0.75<br>(0.49-1.16)                                                                             | 184                     | 911                    |
| Czech Republic <sup>b</sup> | 1.06<br>(0.33-3.47)                                                                               | 0.86<br>(0.58-1.27)                                                                                  | 0.62<br>(0.36-1.08)                                                                             | 188                     | 853                    |
| Dominican<br>Republic       | 0.81<br>(0.58-1.12)                                                                               | 1.18<br>(0.96-1.46)                                                                                  | <b>1.36*</b><br><b>(1.01-1.83)</b>                                                              | 250                     | 2980                   |
| Ecuador                     | 0.78<br>(0.48-1.28)                                                                               | 0.92<br>(0.76-1.12)                                                                                  | 1.00<br>(0.71-1.42)                                                                             | 220                     | 3496                   |
| Estonia                     | 0.24<br>(0.09-0.60)                                                                               | 1.17<br>(0.86-1.59)                                                                                  | 0.82<br>(0.58-1.16)                                                                             | 49                      | 955                    |
| Ethiopia <sup>a</sup>       | 0.70<br>(0.26-1.85)                                                                               | 1.30<br>(0.71-2.39)                                                                                  | 1.25<br>(0.26-6.05)                                                                             | 94                      | 919                    |
| Georgia                     | 2.01<br>(0.93-4.36)                                                                               | 1.03<br>(0.75-1.41)                                                                                  | 1.34<br>(0.82-2.19)                                                                             | 68                      | 2579                   |
| Ghana                       | 0.99<br>(0.76-1.28)                                                                               | <b>1.41*</b><br><b>(1.08-1.86)</b>                                                                   | <b>2.63***</b><br><b>(1.57-4.39)</b>                                                            | 269                     | 3310                   |
| Guatemala <sup>c</sup>      | 1.43                                                                                              | 1.21                                                                                                 | 0.84                                                                                            | ---                     | 2869                   |

*Socio-economic disparities in obesity and underweight*

|                           |                                    |                                      |                                      |     |       |
|---------------------------|------------------------------------|--------------------------------------|--------------------------------------|-----|-------|
|                           | (0.81-2.50)                        | (0.99-1.48)                          | (0.62-1.14)                          |     |       |
| Hungary                   | 0.90<br>(0.44-1.87)                | 0.96<br>(0.74-1.24)                  | 0.82<br>(0.58-1.16)                  | 194 | 1299  |
| India                     | 0.89<br>(0.74-1.08)                | <b>1.75***</b><br><b>(1.42-2.14)</b> | <b>1.76***</b><br><b>(1.16-2.67)</b> | 369 | 7306  |
| Kazakhstan                | 1.02<br>(0.59-1.77)                | 1.00<br>(0.84-1.19)                  | 0.74<br>(0.54-1.03)                  | 65  | 4186  |
| Kenya                     | 0.86<br>(0.66-1.12)                | 2.00<br>(1.62-2.48)                  | 2.76<br>(1.96-3.89)                  | 275 | 4020  |
| Laos                      | <b>0.63*</b><br><b>(0.44-0.91)</b> | 1.33<br>(0.99-1.80)                  | 1.86<br>(0.97-3.56)                  | 248 | 3536  |
| Latvia <sup>b</sup>       | 2.15<br>(0.38-12.07)               | <b>0.71*</b><br><b>(0.51-0.98)</b>   | 0.75<br>(0.45-1.23)                  | 133 | 714   |
| Malawi                    | 0.92<br>(0.64-1.31)                | 1.25<br>(0.97-1.61)                  | 1.55<br>(1.00-2.42)                  | 71  | 4855  |
| Malaysia                  | 1.07<br>(0.83-1.39)                | 0.88<br>(0.74-1.05)                  | <b>0.64***</b><br><b>(0.50-0.82)</b> | 390 | 4546  |
| Mali <sup>b</sup>         | 1.26<br>(0.50-3.17)                | 1.25<br>(0.66-2.37)                  | 1.43<br>(0.50-4.09)                  | 173 | 326   |
| Mauritania                | 1.04<br>(0.61-1.76)                | 0.97<br>(0.67-1.41)                  | 1.22<br>(0.74-2.00)                  | 156 | 2586  |
| Mauritius                 | 1.17<br>(0.80-1.71)                | 0.84<br>(0.67-1.07)                  | 0.80<br>(0.53-1.22)                  | 100 | 2423  |
| Mexico                    | 1.04<br>(0.79-1.36)                | 1.07<br>(0.98-1.17)                  | 1.03<br>(0.90-1.18)                  | 453 | 22668 |
| Morocco                   | 1.65<br>(0.75-3.63)                | 1.02<br>(0.64-1.61)                  | 0.94<br>(0.47-1.89)                  | 244 | 1722  |
| Myanmar                   | 1.34<br>(0.96-1.86)                | <b>1.74***</b><br><b>(1.29-2.35)</b> | <b>1.98*</b><br><b>(1.01-3.89)</b>   | 110 | 5539  |
| Namibia                   | 0.85<br>(0.65-1.10)                | 1.02<br>(0.82-1.27)                  | 1.09<br>(0.76-1.56)                  | 229 | 3451  |
| Nepal                     | 0.79<br>(0.58-1.09)                | 1.18<br>(0.87-1.59)                  | <b>0.30**</b><br><b>(0.13-0.70)</b>  | 267 | 2608  |
| Pakistan                  | 0.84<br>(0.62-1.13)                | 1.01<br>(0.78-1.30)                  | 1.29<br>(0.85-1.96)                  | 285 | 2835  |
| Paraguay                  | 1.31<br>(0.90)                     | 1.12<br>(0.94-1.33)                  | 1.09<br>(0.84-1.41)                  | 498 | 4505  |
| Philippines               | 1.01<br>(0.81-1.26)                | 1.12<br>(0.91-1.37)                  | 1.36<br>(0.96-1.92)                  | 238 | 7557  |
| Russian Federation        | 0.84<br>(0.32-2.19)                | 0.86<br>(0.66-1.10)                  | 0.69<br>(0.45-1.05)                  | 123 | 3373  |
| Senegal                   | 1.09<br>(0.74-1.59)                | 1.06<br>(0.74-1.53)                  | 0.99<br>(0.45-2.19)                  | 225 | 1271  |
| Slovakia <sup>d</sup>     | 2.09<br>(0.58-7.53)                | <b>0.57**</b><br><b>(0.39-0.84)</b>  | <b>0.32***</b><br><b>(0.19-0.54)</b> | 282 | 1650  |
| Slovenia <sup>c,e</sup>   | ---                                | ---                                  | ---                                  | --- | 550   |
| South Africa <sup>b</sup> | 0.69<br>(0.42-1.14)                | 0.86<br>(0.60-1.22)                  | 0.57<br>(0.34-0.95)                  | 151 | 1256  |
| Spain                     | 1.06                               | <b>0.82*</b>                         | 0.89                                 | 993 | 5964  |

*Socio-economic disparities in obesity and underweight*

|                      |                                      |                     |                                    |     |      |
|----------------------|--------------------------------------|---------------------|------------------------------------|-----|------|
|                      | (0.63-1.77)                          | <b>(0.71-0.94)</b>  | (0.74-1.07)                        |     |      |
| Sri Lanka            | <b>0.62***</b><br><b>(0.48-0.80)</b> | 1.25<br>(0.98-1.60) | 1.30<br>(0.79-2.15)                | 144 | 4661 |
| Swaziland            | 0.71<br>(0.26-1.91)                  | 0.85<br>(0.62-1.18) | 1.17<br>(0.83-1.64)                | 95  | 1581 |
| Tunisia              | 0.84<br>(0.54-1.31)                  | 1.15<br>(0.92-1.45) | <b>1.52*</b><br><b>(1.02-2.27)</b> | 265 | 4117 |
| Turkey <sup>f</sup>  | 1.02<br>(0.80-1.31)                  | 1.00<br>(0.90-1.12) | 1.15<br>(0.98-1.35)                | 471 | 8041 |
| Ukraine              | 1.54<br>(0.74-3.18)                  | 0.88<br>(0.66-1.16) | 0.78<br>(0.55-1.12)                | 111 | 2187 |
| United Arab Emirates | 1.49<br>(0.58-3.83)                  | 0.77<br>(0.54-1.09) | 0.45<br>(0.28-0.75)                | 60  | 1084 |
| Uruguay              | 2.07<br>(0.89-4.82)                  | 0.75<br>(0.58-0.98) | 1.42<br>(0.94-2.14)                | 61  | 2847 |
| Vietnam              | 0.86<br>(0.64-1.14)                  | 1.11<br>(0.54-2.29) | ---                                | 137 | 2995 |
| Zambia <sup>c</sup>  | 1.52<br>(1.02-2.26)                  | 1.11<br>(0.86-1.45) | 1.25<br>(0.80-1.95)                | --- | 2139 |
| Zimbabwe             | 0.93<br>(0.61-1.42)                  | 1.05<br>(0.85-1.31) | <b>1.45*</b><br><b>(1.05-2.00)</b> | 125 | 2388 |

\*Boded indicates significance ( $p < 0.05$ ).

<sup>a</sup>Adjusted using income as continuous variable and age as 3-category variable (18-29 years old; 30-49 years old; 50 plus).

<sup>b</sup>Adjusted using age as a 3-category variable (18-29 years old; 30-49 years old; 50 plus).

<sup>c</sup>Robust standard errors.

<sup>d</sup>Adjusted using age as continuous variable.

<sup>e</sup>Unadjusted for urbanicity.

<sup>f</sup>Unadjusted for income.

*Socio-economic disparities in obesity and underweight*

**Table 2S: Sex -** Relative risk ratios (RRRs) and 95% confidence interval (CI) from multinomial multivariable model (using BMI 18.5-24.9 kg/m<sup>2</sup> as the referent) regressing BMI classification on male sex with clustered robust standard errors (CRSE) of primary sampling units (PSUs), adjusted for urbanicity, age strata, and income quintile, World Health Survey, 2002–2003.

| Country                     | Underweight<br>Relative Risk Ratio<br>(RRR)<br>95% Confidence<br>Intervals (95%CI) | Overweight<br>Relative Risk Ratio<br>(RRR)<br>95% Confidence<br>Intervals (95%CI) | Obese<br>Relative Risk Ratio<br>(RRR)<br>95% Confidence<br>Intervals (95%CI) |
|-----------------------------|------------------------------------------------------------------------------------|-----------------------------------------------------------------------------------|------------------------------------------------------------------------------|
| Bangladesh <sup>a</sup>     | 1.43 (0.69-2.96)                                                                   | 0.71 (0.39-1.31)                                                                  | 0.54 (0.12-2.49)                                                             |
| Bosnia and Herzegovina      | 0.71 (0.32-1.56)                                                                   | 1.19 (0.87-1.62)                                                                  | <b>0.50 (0.27-0.93)</b>                                                      |
| Brazil                      | <b>0.57 (0.42-0.79)</b>                                                            | 1.15 (1.00-1.33)                                                                  | <b>0.72 (0.57-0.91)</b>                                                      |
| Burkina Faso <sup>a</sup>   | 0.89 (0.53-1.50)                                                                   | 0.84 (0.66-1.08)                                                                  | <b>0.41 (0.21-0.82)</b>                                                      |
| Chad                        | 0.91 (0.65-1.27)                                                                   | 0.97 (0.81-1.16)                                                                  | 1.14 (0.84-1.56)                                                             |
| China                       | 0.85 (0.65-1.12)                                                                   | 1.04 (0.82-1.33)                                                                  | 0.64 (0.32-1.30)                                                             |
| Comoros                     | <b>0.51 (0.33-0.78)</b>                                                            | <b>0.77 (0.61-0.97)</b>                                                           | <b>0.29 (0.12-0.70)</b>                                                      |
| Congo                       | 0.95 (0.71-1.27)                                                                   | 0.96 (0.74-1.24)                                                                  | 0.61 (0.38-1.01)                                                             |
| Côte d'Ivoire               | <b>0.65 (0.46-0.92)</b>                                                            | 0.82 (0.68-1.00)                                                                  | <b>0.32 (0.21-0.48)</b>                                                      |
| Croatia                     | 0.35 (0.08-1.41)                                                                   | <b>1.41 (1.05-1.89)</b>                                                           | 0.98 (0.64-1.52)                                                             |
| Czech Republic <sup>b</sup> | <b>0.12 (0.02-0.63)</b>                                                            | <b>2.17 (1.62-2.90)</b>                                                           | 1.43 (0.92-2.22)                                                             |
| Dominican Republic          | <b>0.70 (0.51-0.95)</b>                                                            | <b>1.27 (1.06-1.51)</b>                                                           | 1.00 (0.78-1.29)                                                             |
| Ecuador                     | 0.96 (0.65-1.43)                                                                   | <b>1.31 (1.13-1.52)</b>                                                           | 0.53 (0.40-0.69)                                                             |
| Estonia                     | <b>0.19 (0.04-0.85)</b>                                                            | 0.90 (0.69-1.18)                                                                  | <b>0.47 (0.32-0.69)</b>                                                      |
| Ethiopia <sup>a</sup>       | 0.78 (0.45-1.36)                                                                   | 0.62 (0.36-1.06)                                                                  | 0.47 (0.15-1.44)                                                             |
| Georgia                     | <b>0.34 (0.18-0.62)</b>                                                            | <b>1.47 (1.18-1.85)</b>                                                           | 0.81 (0.60-1.10)                                                             |
| Ghana                       | 1.19 (0.95-1.49)                                                                   | <b>0.56 (0.46-0.68)</b>                                                           | <b>0.24 (0.16-0.37)</b>                                                      |
| Guatemala <sup>c</sup>      | 1.25 (0.79-1.96)                                                                   | <b>0.79 (0.66-0.94)</b>                                                           | <b>0.47 (0.35-0.63)</b>                                                      |
| Hungary                     | <b>0.19 (0.07-0.52)</b>                                                            | 1.48 (1.13-1.93)                                                                  | 0.98 (0.71-1.37)                                                             |
| India                       | <b>1.51 (1.34-1.71)</b>                                                            | <b>0.77 (0.64-0.93)</b>                                                           | <b>0.44 (0.32-0.62)</b>                                                      |
| Kazakhstan                  | <b>0.30 (0.19-0.46)</b>                                                            | 1.15 (0.95-1.38)                                                                  | <b>0.44 (0.33-0.59)</b>                                                      |
| Kenya                       | <b>1.91 (1.55-2.37)</b>                                                            | <b>0.56 (0.46-0.69)</b>                                                           | <b>0.32 (0.22-0.47)</b>                                                      |
| Laos                        | 1.02 (0.80-1.30)                                                                   | <b>0.76 (0.61-0.93)</b>                                                           | 0.52 (0.26-1.03)                                                             |
| Latvia <sup>b</sup>         | 0.25 (0.05-1.28)                                                                   | 1.20 (0.80-1.80)                                                                  | <b>0.49 (0.28-0.84)</b>                                                      |
| Malawi                      | 0.84 (0.65-1.09)                                                                   | 1.15 (0.99-1.33)                                                                  | 0.89 (0.66-1.19)                                                             |
| Malaysia                    | <b>1.43 (1.13-1.79)</b>                                                            | 1.06 (0.92-1.23)                                                                  | <b>0.72 (0.57-0.90)</b>                                                      |
| Mali <sup>b</sup>           | 1.06 (0.28-4.03)                                                                   | 0.63 (0.27-1.50)                                                                  | 0.87 (0.21-3.71)                                                             |
| Mauritania                  | 1.34 (0.95-1.89)                                                                   | <b>0.49 (0.39-0.62)</b>                                                           | <b>0.32 (0.21-0.47)</b>                                                      |
| Mauritius                   | 0.85 (0.60-1.19)                                                                   | 0.90 (0.70-1.15)                                                                  | <b>0.65 (0.46-0.93)</b>                                                      |
| Mexico                      | 1.01 (0.82-1.26)                                                                   | <b>1.12 (1.05-1.19)</b>                                                           | <b>0.60 (0.55-0.65)</b>                                                      |
| Morocco                     | 0.88 (0.54-1.44)                                                                   | <b>0.56 (0.42-0.73)</b>                                                           | <b>0.24 (0.16-0.36)</b>                                                      |
| Myanmar                     | 1.03 (0.84-1.26)                                                                   | <b>0.61 (0.49-0.75)</b>                                                           | <b>0.57 (0.33-0.98)</b>                                                      |

*Socio-economic disparities in obesity and underweight*

|                           |                         |                         |                         |
|---------------------------|-------------------------|-------------------------|-------------------------|
| Namibia                   | 0.81 (0.64-1.02)        | 0.86 (0.71-1.03)        | <b>0.46 (0.34-0.60)</b> |
| Nepal                     | 1.25 (0.94-1.67)        | 0.94 (0.71-1.26)        | <b>0.51 (0.27-0.98)</b> |
| Pakistan                  | 1.22 (0.92-1.63)        | <b>0.80 (0.66-0.97)</b> | 0.74 (0.52-1.05)        |
| Paraguay                  | <b>0.46 (0.34-0.64)</b> | <b>1.22 (1.06-1.40)</b> | 0.84 (0.68-1.05)        |
| Philippines               | 1.00 (0.84-1.19)        | 1.00 (0.87-1.16)        | <b>0.62 (0.48-0.79)</b> |
| Russian Federation        | <b>0.32 (0.16-0.64)</b> | 1.13 (0.93-1.37)        | <b>0.36 (0.28-0.46)</b> |
| Senegal                   | 1.17 (0.82-1.68)        | <b>0.61 (0.45-0.84)</b> | <b>0.34 (0.20-0.57)</b> |
| Slovakia <sup>d</sup>     | <b>0.05 (0.01-0.22)</b> | <b>3.45 (2.62-4.55)</b> | <b>1.78 (1.18-2.66)</b> |
| Slovenia <sup>c,e</sup>   | ---                     | 1.15 (0.60-2.21)        | 1.15 (0.67-1.98)        |
| South Africa <sup>b</sup> | 0.96 (0.58-1.61)        | 0.91 (0.67-1.23)        | <b>0.58 (0.42-0.81)</b> |
| Spain                     | 0.53 (0.31-0.89)        | <b>2.04 (1.81-2.31)</b> | <b>1.40 (1.19-1.65)</b> |
| Sri Lanka                 | <b>1.34 (1.13-1.60)</b> | 0.85 (0.70-1.03)        | <b>0.51 (0.37-0.70)</b> |
| Swaziland                 | 0.84 (0.42-1.67)        | 0.98 (0.75-1.27)        | <b>0.57 (0.43-0.77)</b> |
| Tunisia                   | 1.08 (0.77-1.50)        | <b>0.75 (0.65-0.86)</b> | <b>0.38 (0.30-0.50)</b> |
| Turkey <sup>f</sup>       | <b>0.41 (0.31-0.55)</b> | 1.01 (0.91-1.12)        | <b>0.52 (0.45-0.61)</b> |
| Ukraine                   | <b>0.16 (0.07-0.39)</b> | 1.10 (0.87-1.40)        | <b>0.42 (0.30-0.59)</b> |
| United Arab Emirates      | 1.25 (0.58-2.72)        | 1.16 (0.88-1.51)        | 0.98 (0.69-1.39)        |
| Uruguay                   | <b>0.41 (0.20-0.84)</b> | <b>1.87 (1.62-2.15)</b> | 0.90 (0.71-1.14)        |
| Vietnam                   | 1.21 (0.98-1.49)        | 0.95 (0.63-1.44)        | ---                     |
| Zambia <sup>c</sup>       | 0.83 (0.59-1.18)        | 0.88 (0.70-1.11)        | <b>0.62 (0.43-0.90)</b> |
| Zimbabwe                  | <b>1.49 (1.03-2.16)</b> | <b>0.77 (0.64-0.94)</b> | <b>0.59 (0.43-0.80)</b> |

\*Bolded indicates significance ( $p < 0.05$ ).

<sup>a</sup>Adjusted using income as continuous variable and age as 3-category variable (18-29 years old; 30-49 years old; 50 plus).

<sup>b</sup>Adjusted using age as a 3-category variable (18-29 years old; 30-49 years old; 50 plus).

<sup>c</sup>Robust standard errors.

<sup>d</sup>Adjusted using age as continuous variable.

<sup>e</sup>Unadjusted for urbanicity.

<sup>f</sup>Unadjusted for income.

*Socio-economic disparities in obesity and underweight*

**Table 3S: Income** - Relative risk ratios (RRRs) and 95% confidence interval (CI) from multinomial multivariable model (using BMI 18.5-24.9 kg/m<sup>2</sup> as the referent) regressing BMI underweight classification on income quintiles (using highest income quintile as the referent) with clustered robust standard errors (CRSE) of primary sampling units (PSUs), adjusted for urbanicity, age strata, and sex, World Health Survey, 2002–2003.

|                             | <b>Lowest income<br/>quintile<br/>RRR<br/>(95%CI)</b> | <b>IQ<br/>2<br/>RRR<br/>(95%CI)</b> | <b>IQ<br/>3<br/>RRR<br/>(95%CI)</b> | <b>IQ<br/>4<br/>RRR<br/>(95%CI)</b> | <b>IQ<br/>5<br/>(ref)</b> |
|-----------------------------|-------------------------------------------------------|-------------------------------------|-------------------------------------|-------------------------------------|---------------------------|
| Bangladesh <sup>a</sup>     | ---                                                   | ---                                 | ---                                 | ---                                 | ---                       |
| Bosnia and Herzegovina      | 2.56 (0.48-13.76)                                     | 3.70 (0.72-19.00)                   | 1.42 (0.24-8.49)                    | 2.96 (0.59-14.92)                   | ---                       |
| Brazil                      | <b>1.92 (1.12-3.29)</b>                               | 1.33 (0.79-2.23)                    | 1.19 (0.70-2.03)                    | 1.15 (0.68-1.94)                    | ---                       |
| Burkina Faso <sup>a</sup>   | ---                                                   | ---                                 | ---                                 | ---                                 | ---                       |
| Chad                        | <b>1.73 (1.02-2.94)</b>                               | 0.88 (0.47-1.65)                    | 1.04 (0.56-1.92)                    | 0.94 (0.60-1.49)                    | ---                       |
| China                       | 1.85 (0.98-3.49)                                      | 1.48 (0.81-2.72)                    | 1.04 (0.58-1.85)                    | 0.69 (0.40-1.19)                    | ---                       |
| Comoros                     | 1.82 (0.73-4.56)                                      | 1.20 (0.52-2.77)                    | 1.46 (0.60-3.60)                    | 1.51 (0.72-3.14)                    | ---                       |
| Congo                       | 1.80 (0.92-3.54)                                      | 1.32 (0.67-2.61)                    | 0.73 (0.33-1.61)                    | 1.15 (0.56-2.35)                    | ---                       |
| Côte d'Ivoire               | 1.42 (0.81-2.51)                                      | 1.14 (0.63-2.06)                    | 0.85 (0.43-1.66)                    | 1.18 (0.65-2.14)                    | ---                       |
| Croatia                     | 4.62 (0.49-43.16)                                     | 4.20 (0.65-26.98)                   | 2.55 (0.49-13.28)                   | 0.98 (0.16-6.01)                    | ---                       |
| Czech Republic <sup>b</sup> | ---                                                   | 0.31 (0.04-2.58)                    | 0.71 (0.17-2.94)                    | 1.95 (0.58-6.54)                    | ---                       |
| Dominican Republic          | 1.24 (0.71-2.15)                                      | 1.16 (0.68-1.97)                    | 1.30 (0.77-2.19)                    | 0.93 (0.55-1.58)                    | ---                       |
| Ecuador                     | 1.09 (0.55-2.16)                                      | 0.79 (0.39-1.62)                    | 1.00 (0.57-1.74)                    | 0.61 (0.32-1.19)                    | ---                       |
| Estonia                     | 0.34 (0.10-1.24)                                      | 0.15 (0.02-1.02)                    | 0.44 (0.14-1.42)                    | 0.39 (0.13-1.15)                    | ---                       |
| Ethiopia <sup>a</sup>       | ---                                                   | ---                                 | ---                                 | ---                                 | ---                       |
| Georgia                     | 1.56 (0.57-4.28)                                      | 1.44 (0.58-3.59)                    | 1.45 (0.65-3.21)                    | 2.06 (0.92-4.60)                    | ---                       |
| Ghana                       | 1.38 (0.91-2.11)                                      | 1.65 (1.08-2.53)                    | 1.06 (0.68-1.65)                    | 1.08 (0.69-1.68)                    | ---                       |
| Guatemala <sup>c</sup>      | 0.77 (0.30-1.95)                                      | 1.22 (0.57-2.60)                    | 1.29 (0.65-2.56)                    | 0.75 (0.39-1.46)                    | ---                       |
| Hungary                     | 0.88 (0.28-2.77)                                      | 1.57 (0.69-3.61)                    | 0.10 (0.01-0.81)                    | 1.24 (0.55-2.81)                    | ---                       |
| India                       | <b>1.88 (1.49-2.38)</b>                               | <b>1.73 (1.38-2.18)</b>             | <b>1.71 (1.39-2.11)</b>             | <b>1.38 (1.12-1.70)</b>             | ---                       |
| Kazakhstan                  | 1.37 (0.62-3.00)                                      | 1.25 (0.58-2.70)                    | 0.76 (0.35-1.66)                    | 1.00 (0.51-1.96)                    | ---                       |
| Kenya                       | <b>2.11 (1.43-3.11)</b>                               | <b>1.59 (1.05-2.40)</b>             | 1.24 (0.85-1.82)                    | 1.22 (0.79-1.88)                    | ---                       |
| Laos                        | 0.94 (0.58-1.53)                                      | 1.15 (0.71-1.85)                    | 0.96 (0.61-1.53)                    | 1.06 (0.69-1.60)                    | ---                       |
| Latvia <sup>b</sup>         | ---                                                   | 0.37 (0.04-3.39)                    | 1.76 (0.47-6.65)                    | 0.27 (0.03-2.18)                    | ---                       |
| Malawi                      | 1.38 (0.93-2.06)                                      | 1.45 (0.94-2.39)                    | 1.30 (0.90-1.87)                    | 1.21 (0.82-1.79)                    | ---                       |
| Malaysia                    | <b>1.66 (1.09-2.52)</b>                               | <b>1.69 (1.15-2.48)</b>             | 1.30 (0.91-1.86)                    | 1.17 (0.80-1.72)                    | ---                       |
| Mali <sup>b</sup>           | ---                                                   | 1.36 (0.30-6.24)                    | 0.80 (0.21-3.03)                    | 1.55 (0.52-4.65)                    | ---                       |
| Mauritania                  | 1.13 (0.57-2.23)                                      | 0.68 (0.34-1.35)                    | 1.21 (0.72-2.05)                    | 1.42 (0.86-2.33)                    | ---                       |
| Mauritius                   | 1.14 (0.63-2.06)                                      | 1.16 (0.68-1.96)                    | 1.23 (0.78-1.93)                    | 1.01 (0.65-1.58)                    | ---                       |

*Socio-economic disparities in obesity and underweight*

|                           |                         |                         |                         |                         |     |
|---------------------------|-------------------------|-------------------------|-------------------------|-------------------------|-----|
| Mexico                    | 1.29 (0.89-1.87)        | 1.25 (0.88-1.77)        | 1.17 (0.82-1.66)        | 1.13 (0.80-1.61)        | --- |
| Morocco                   | 1.28 (0.43-3.77)        | 0.98 (0.38-2.51)        | 0.88 (0.41-1.91)        | 1.12 (0.63-1.96)        | --- |
| Myanmar                   | 1.20 (0.82-1.76)        | 1.26 (0.88-1.80)        | 1.34 (0.97-1.86)        | 1.12 (0.84-1.50)        | --- |
| Namibia                   | 1.29 (0.86-1.93)        | 1.01 (0.67-1.53)        | 0.93 (0.60-1.45)        | 0.80 (0.51-1.24)        | --- |
| Nepal                     | 1.51 (0.97-2.35)        | 1.49 (1.02-2.19)        | <b>1.49 (1.06-2.09)</b> | 1.33 (0.98-1.81)        | --- |
| Pakistan                  | 1.24 (0.81-1.92)        | 1.26 (0.80-1.98)        | 0.86 (0.53-1.38)        | 1.35 (0.86-2.13)        | --- |
| Paraguay                  | <b>2.49 (1.41-4.41)</b> | 1.66 (0.96-2.86)        | <b>1.74 (1.06-2.87)</b> | 0.87 (0.47-1.63)        | --- |
| Philippines               | 0.93 (0.68-1.26)        | 0.97 (0.73-1.28)        | 0.96 (0.75-1.23)        | 0.94 (0.73-1.21)        | --- |
| Russian Federation        | 1.12 (0.46-2.74)        | 0.42 (0.20-0.91)        | 0.47 (0.22-1.02)        | 0.55 (0.26-1.15)        | --- |
| Senegal                   | 1.78 (0.96-3.31)        | 1.45 (0.86-2.44)        | 0.92 (0.47-1.79)        | 1.19 (0.68-2.10)        | --- |
| Slovakia <sup>d</sup>     | ---                     | 0.76 (0.35-1.63)        | 0.72 (0.29-1.77)        | 1.46 (0.57-3.74)        | --- |
| Slovenia <sup>c,e</sup>   | ---                     | ---                     | ---                     | ---                     | --- |
| South Africa <sup>b</sup> | ---                     | 0.92 (0.50-1.69)        | 0.55 (0.25-1.23)        | <b>2.20 (1.19-4.07)</b> | --- |
| Spain                     | 0.85 (0.38-1.93)        | 1.13 (0.57-2.21)        | 0.75 (0.39-1.44)        | 0.90 (0.49-1.66)        | --- |
| Sri Lanka                 | <b>1.75 (1.31-2.35)</b> | <b>1.60 (1.20-2.13)</b> | <b>1.33 (1.02-1.74)</b> | <b>1.41 (1.08-1.85)</b> | --- |
| Swaziland                 | 2.56 (0.93-7.09)        | 0.92 (0.32-2.70)        | 1.67 (0.62-4.49)        | 1.13 (0.37-3.39)        | --- |
| Tunisia                   | 1.15 (0.61-2.16)        | 1.02 (0.57-1.84)        | 1.01 (0.59-1.74)        | 0.95 (0.57-1.60)        | --- |
| Turkey <sup>f</sup>       | ---                     | ---                     | ---                     | ---                     | --- |
| Ukraine                   | 1.09 (0.43-2.76)        | 0.49 (0.20-1.24)        | 1.08 (0.47-2.50)        | 1.11 (0.51-2.44)        | --- |
| United Arab Emirates      | 0.67 (0.24-1.86)        | 2.26 (0.91-5.57)        | 0.88 (0.27-2.90)        | 1.16 (0.40-3.34)        | --- |
| Uruguay                   | 1.12 (0.56-2.23)        | 1.08 (0.57-2.05)        | 1.31 (0.64-2.71)        | 0.76 (0.39-1.48)        | --- |
| Vietnam                   | 1.34 (0.93-1.93)        | 1.24 (0.90-1.70)        | <b>1.43 (1.03-2.00)</b> | 1.11 (0.81-1.52)        | --- |
| Zambia <sup>c</sup>       | 1.81 (0.95-3.43)        | 1.75 (0.96-3.17)        | 1.43 (0.76-2.69)        | <b>2.00 (1.12-3.57)</b> | --- |
| Zimbabwe                  | 1.17 (0.61-2.27)        | 0.78 (0.41-1.49)        | 0.70 (0.40-1.22)        | 0.85 (0.45-1.59)        | --- |

\*Indicates significance ( $p < 0.05$ ) of at least one income quintile compared to wealthiest quintile.

Bolded indicates significance ( $p < 0.05$ ).

<sup>a</sup>Income quintiles created sparse cells for regression analyses.

<sup>b</sup>Adjusted using age as a 3-category variable (18-29 years old; 30-49 years old; 50 plus).

<sup>c</sup>Robust standard errors.

<sup>d</sup>Adjusted using age as continuous variable.

<sup>e</sup>Unadjusted for urbanicity.

<sup>f</sup>Unadjusted for income.



*Socio-economic disparities in obesity and underweight*

**Table 4S: Income** - Relative risk ratios (RRRs) and 95% confidence interval (CI) from multinomial multivariable model (using BMI 18.5-24.9 kg/m<sup>2</sup> as the referent) regressing BMI overweight classification on income quintiles (using highest income quintile as the referent) with clustered robust standard errors (CRSE) of primary sampling units (PSUs), adjusted for urbanicity, age strata, and sex, World Health Survey, 2002–2003.

|                             | <b>Lowest income<br/>quintile<br/>RRR<br/>(95%CI)</b> | <b>IQ<br/>2<br/>RRR<br/>(95%CI)</b> | <b>IQ<br/>3<br/>RRR<br/>(95%CI)</b> | <b>IQ<br/>4<br/>RRR<br/>(95%CI)</b> | <b>IQ<br/>5<br/>(ref)</b> |
|-----------------------------|-------------------------------------------------------|-------------------------------------|-------------------------------------|-------------------------------------|---------------------------|
| Bangladesh <sup>a</sup>     | ---                                                   | ---                                 | ---                                 | ---                                 | ---                       |
| Bosnia and Herzegovina      | 0.68 (0.36-1.29)                                      | <b>0.58 (0.34-0.99)</b>             | 0.67 (0.40-1.15)                    | 0.91 (0.56-1.48)                    | ---                       |
| Brazil                      | <b>0.74 (0.58-0.94)</b>                               | 0.85 (0.68-1.06)                    | 1.06 (0.85-1.32)                    | 1.02 (0.82-1.25)                    | ---                       |
| Burkina Faso <sup>a</sup>   | ---                                                   | ---                                 | ---                                 | ---                                 | ---                       |
| Chad                        | 1.45 (0.96-2.19)                                      | <b>1.51 (1.06-2.16)</b>             | 1.16 (0.86-1.57)                    | 1.04 (0.78-1.37)                    | ---                       |
| China                       | <b>0.19 (0.11-0.32)</b>                               | <b>0.60 (0.39-0.90)</b>             | 0.91 (0.64-1.29)                    | 0.98 (0.71-1.35)                    | ---                       |
| Comoros                     | <b>0.67 (0.45-0.99)</b>                               | 0.86 (0.57-1.29)                    | 0.67 (0.45-1.00)                    | <b>0.64 (0.43-0.96)</b>             | ---                       |
| Congo                       | <b>0.47 (0.29-0.75)</b>                               | <b>0.61 (0.41-0.90)</b>             | <b>0.56 (0.39-0.79)</b>             | <b>0.63 (0.46-0.86)</b>             | ---                       |
| Côte d'Ivoire               | <b>0.66 (0.46-0.94)</b>                               | <b>0.68 (0.48-0.95)</b>             | 0.76 (0.54-1.06)                    | 0.84 (0.61-1.15)                    | ---                       |
| Croatia                     | 0.62 (0.35-1.11)                                      | 1.59 (0.95-2.64)                    | 1.30 (0.80-2.13)                    | 1.22 (0.75-1.99)                    | ---                       |
| Czech Republic <sup>b</sup> | ---                                                   | 1.36 (0.88-2.10)                    | 1.24 (0.81-1.91)                    | 0.89 (0.58-1.36)                    | ---                       |
| Dominican Republic          | <b>0.58 (0.42-0.81)</b>                               | 0.83 (0.62-1.13)                    | 0.92 (0.70-1.23)                    | 0.84 (0.64-1.10)                    | ---                       |
| Ecuador                     | <b>0.69 (0.53-0.89)</b>                               | 0.78 (0.61-1.01)                    | 0.86 (0.66-1.11)                    | 1.04 (0.83-1.30)                    | ---                       |
| Estonia                     | 0.70 (0.48-1.00)                                      | <b>0.70 (0.49-0.99)</b>             | 0.71 (0.44-1.16)                    | 1.11 (0.75-1.64)                    | ---                       |
| Ethiopia <sup>a</sup>       | ---                                                   | ---                                 | ---                                 | ---                                 | ---                       |
| Georgia                     | <b>0.58 (0.40-0.86)</b>                               | 0.72 (0.50-1.04)                    | 0.86 (0.64-1.17)                    | 1.08 (0.82-1.41)                    | ---                       |
| Ghana                       | <b>0.29 (0.20-0.42)</b>                               | <b>0.39 (0.28-0.56)</b>             | <b>0.47 (0.34-0.65)</b>             | <b>0.71 (0.52-0.98)</b>             | ---                       |
| Guatemala <sup>c</sup>      | <b>0.58 (0.41-0.81)</b>                               | 0.74 (0.54-1.01)                    | 0.99 (0.76-1.29)                    | 0.98 (0.78-1.23)                    | ---                       |
| Hungary                     | 0.64 (0.40-1.00)                                      | 0.75 (0.48-1.17)                    | 0.75 (0.52-1.08)                    | 0.98 (0.65-1.46)                    | ---                       |
| India                       | <b>0.47 (0.33-0.65)</b>                               | <b>0.51 (0.38-0.69)</b>             | <b>0.62 (0.47-0.82)</b>             | <b>0.78 (0.62-0.99)</b>             | ---                       |
| Kazakhstan                  | <b>0.69 (0.52-0.92)</b>                               | 0.81 (0.64-1.02)                    | 0.91 (0.73-1.14)                    | 0.98 (0.78-1.22)                    | ---                       |
| Kenya                       | <b>0.30 (0.22-0.41)</b>                               | <b>0.37 (0.28-0.51)</b>             | <b>0.45 (0.35-0.59)</b>             | <b>0.73 (0.57-0.93)</b>             | ---                       |
| Laos                        | <b>0.40 (0.27-0.60)</b>                               | <b>0.34 (0.22-0.52)</b>             | <b>0.37 (0.24-0.57)</b>             | <b>0.72 (0.54-0.95)</b>             | ---                       |
| Latvia <sup>b</sup>         | ---                                                   | 1.19 (0.77-1.86)                    | 1.00 (0.55-1.80)                    | 1.22 (0.76-1.97)                    | ---                       |
| Malawi                      | <b>0.53 (0.40-0.69)</b>                               | <b>0.70 (0.56-0.88)</b>             | <b>0.68 (0.54-0.87)</b>             | <b>0.76 (0.61-0.94)</b>             | ---                       |
| Malaysia                    | <b>0.59 (0.45-0.77)</b>                               | 0.90 (0.71-1.14)                    | 0.83 (0.66-1.03)                    | 1.06 (0.87-1.29)                    | ---                       |
| Mali                        | ---                                                   | 0.51 (0.18-1.46)                    | 0.55 (0.25-1.22)                    | 0.66 (0.34-1.26)                    | ---                       |
| Mauritania                  | 0.74 (0.48-1.14)                                      | 1.00 (0.66-1.51)                    | 1.02 (0.71-1.46)                    | 0.83 (0.60-1.14)                    | ---                       |
| Mauritius                   | 0.98 (0.71-1.35)                                      | 0.86 (0.65-1.14)                    | 0.89 (0.67-1.17)                    | 0.95 (0.71-1.28)                    | ---                       |
| Mexico                      | <b>0.83 (0.73-0.93)</b>                               | 1.05 (0.94-1.16)                    | <b>1.12 (1.01-1.24)</b>             | <b>1.21 (1.09-1.35)</b>             | --                        |

*Socio-economic disparities in obesity and underweight*

|                           |                         |                         |                         |                         |     |
|---------------------------|-------------------------|-------------------------|-------------------------|-------------------------|-----|
| Morocco                   | <b>0.41 (0.23-0.72)</b> | <b>0.63 (0.39-1.01)</b> | <b>0.50 (0.34-0.75)</b> | <b>0.66 (0.48-0.91)</b> | --- |
| Myanmar                   | <b>0.51 (0.34-0.78)</b> | <b>0.57 (0.40-0.81)</b> | <b>0.64 (0.48-0.87)</b> | 0.76 (0.58-1.00)        | --- |
| Namibia                   | <b>0.38 (0.27-0.53)</b> | <b>0.51 (0.37-0.69)</b> | <b>0.56 (0.42-0.75)</b> | <b>0.61 (0.47-0.81)</b> | --- |
| Nepal                     | <b>0.34 (0.18-0.62)</b> | <b>0.36 (0.23-0.57)</b> | <b>0.45 (0.32-0.65)</b> | <b>0.38 (0.25-0.56)</b> | --- |
| Pakistan                  | <b>0.47 (0.34-0.64)</b> | <b>0.46 (0.33-0.64)</b> | <b>0.51 (0.38-0.68)</b> | <b>0.59 (0.44-0.79)</b> | --- |
| Paraguay                  | <b>0.39 (0.29-0.51)</b> | <b>0.52 (0.40-0.67)</b> | <b>0.68 (0.56-0.84)</b> | <b>0.89 (0.72-1.09)</b> | --- |
| Philippines               | <b>0.44 (0.34-0.57)</b> | <b>0.78 (0.64-0.95)</b> | <b>0.79 (0.65-0.96)</b> | <b>0.82 (0.67-0.99)</b> | --- |
| Russian Federation        | <b>0.53 (0.36-0.77)</b> | <b>0.70 (0.54-0.91)</b> | 0.80 (0.65-1.00)        | 0.85 (0.67-1.07)        | --- |
| Senegal                   | 0.59 (0.34-1.02)        | <b>0.44 (0.26-0.76)</b> | 0.89 (0.56-1.42)        | 0.91 (0.60-1.39)        | --- |
| Slovakia <sup>d</sup>     | ---                     | 0.99 (0.69-1.42)        | 1.03 (0.70-1.50)        | 0.98 (0.72-1.32)        | --- |
| Slovenia <sup>c,e</sup>   | 1.37 (0.69-2.72)        | 1.15 (0.60-2.21)        | 1.14 (0.61-2.14)        | 1.15 (0.60-2.18)        | --- |
| South Africa <sup>b</sup> | ---                     | 1.12 (0.73-1.72)        | 1.37 (0.94-1.99)        | 1.51 (1.07-2.13)        | --- |
| Spain                     | <b>1.30 (1.04-1.62)</b> | <b>1.33 (1.09-1.62)</b> | 1.17 (0.98-1.41)        | 1.13 (0.95-1.35)        | --- |
| Sri Lanka                 | <b>0.61 (0.41-0.90)</b> | <b>0.65 (0.44-0.96)</b> | <b>0.62 (0.47-0.81)</b> | <b>0.68 (0.52-0.90)</b> | --- |
| Swaziland                 | 0.84 (0.56-1.26)        | 0.79 (0.55-1.14)        | 0.78 (0.53-1.14)        | 0.78 (0.54-1.14)        | --- |
| Tunisia                   | <b>0.52 (0.38-0.71)</b> | <b>0.64 (0.49-0.82)</b> | <b>0.76 (0.59-0.97)</b> | 0.94 (0.76-1.17)        | --- |
| Turkey <sup>f</sup>       | ---                     | ---                     | ---                     | ---                     | --- |
| Ukraine                   | <b>0.57 (0.39-0.84)</b> | <b>0.68 (0.50-0.92)</b> | 0.82 (0.59-1.15)        | 0.85 (0.60-1.23)        | --- |
| United Arab Emirates      | 1.05 (0.72-1.55)        | 1.48 (0.97-2.26)        | 1.09 (0.74-1.61)        | 0.80 (0.49-1.31)        | --- |
| Uruguay                   | 0.93 (0.72-1.20)        | 0.98 (0.73-1.33)        | 1.18 (0.94-1.47)        | 1.04 (0.86-1.27)        | --- |
| Vietnam                   | 0.54 (0.28-1.03)        | <b>0.20 (0.08-0.50)</b> | <b>0.25 (0.12-0.50)</b> | <b>0.31 (0.17-0.57)</b> | --- |
| Zambia <sup>c</sup>       | <b>0.46 (0.30-0.68)</b> | <b>0.35 (0.24-0.52)</b> | <b>0.56 (0.40-0.79)</b> | <b>0.65 (0.47-0.92)</b> | --- |
| Zimbabwe                  | <b>0.56 (0.43-0.74)</b> | <b>0.61 (0.44-0.85)</b> | <b>0.61 (0.46-0.82)</b> | 0.94 (0.73-1.20)        | --- |

\*Indicates significance ( $p < 0.05$ ) of at least one income quintile compared to wealthiest quintile.

\*Bolded indicates significance ( $p < 0.05$ ).

<sup>a</sup>Income quintiles created sparse cells for regression analyses.

<sup>b</sup>Adjusted using age as a 3-category variable (18-29 years old; 30-49 years old; 50 plus).

<sup>c</sup>Robust standard errors.

<sup>d</sup>Adjusted using age as continuous variable.

<sup>e</sup>Unadjusted for urbanicity.

<sup>f</sup>Unadjusted for income.

*Socio-economic disparities in obesity and underweight*

**Table 5S: Income** - Relative risk ratios (RRRs) and 95% confidence interval (CI) from multinomial multivariable model (using BMI 18.5-24.9 kg/m<sup>2</sup> as the referent) regressing BMI obese classification on income quintiles (using highest income quintile as the referent) with clustered robust standard errors (CRSE) of primary sampling units (PSUs), adjusted for urbanicity, age strata, and sex, World Health Survey, 2002–2003.

|                             | <b>Lowest income<br/>quintile<br/>RRR<br/>(95%CI)</b> | <b>IQ<br/>2<br/>RRR<br/>(95%CI)</b> | <b>IQ<br/>3<br/>RRR<br/>(95%CI)</b> | <b>IQ<br/>4<br/>RRR<br/>(95%CI)</b> | <b>IQ<br/>5<br/>(ref)</b> |
|-----------------------------|-------------------------------------------------------|-------------------------------------|-------------------------------------|-------------------------------------|---------------------------|
| Bangladesh <sup>a</sup>     | ---                                                   | ---                                 | ---                                 | ---                                 | ---                       |
| Bosnia and Herzegovina      | 1.13 (0.47-2.70)                                      | 0.93 (0.43-1.98)                    | 0.58 (0.23-1.45)                    | 1.07 (0.46-2.47)                    | ---                       |
| Brazil                      | <b>0.55 (0.35-0.88)</b>                               | 0.77 (0.53-1.13)                    | 0.99 (0.72-1.38)                    | 1.21 (0.85-1.72)                    | ---                       |
| Burkina Faso <sup>a</sup>   | ---                                                   | ---                                 | ---                                 | ---                                 | ---                       |
| Chad                        | 1.31 (0.72-2.37)                                      | 1.18 (0.69-2.02)                    | 1.36 (0.87-2.13)                    | 0.88 (0.56-1.39)                    | ---                       |
| China                       | 0.19 (0.02-2.49)                                      | 2.06 (0.51-8.38)                    | 2.72 (0.82-9.02)                    | 2.69 (0.81-8.97)                    | ---                       |
| Comoros                     | 0.39 (0.10-1.51)                                      | 1.04 (0.42-2.59)                    | 0.78 (0.35-1.70)                    | 1.16 (0.50-2.71)                    | ---                       |
| Congo                       | <b>0.25 (0.10-0.61)</b>                               | <b>0.47 (0.23-0.98)</b>             | <b>0.43 (0.23-0.81)</b>             | <b>0.58 (0.35-0.96)</b>             | ---                       |
| Côte d'Ivoire               | 0.67 (0.33-1.34)                                      | 0.87 (0.47-1.61)                    | 0.51 (0.24-1.08)                    | 1.28 (0.73-2.24)                    | ---                       |
| Croatia                     | 0.82 (0.40-1.66)                                      | 1.71 (0.85-3.45)                    | 1.81 (0.96-3.39)                    | 1.07 (0.52-2.21)                    | ---                       |
| Czech Republic <sup>b</sup> | ---                                                   | 2.34 (1.29-4.27)                    | 1.92 (0.96-3.83)                    | 0.95 (0.49-1.81)                    | ---                       |
| Dominican Republic          | <b>0.25 (0.14-0.44)</b>                               | 0.71 (0.45-1.12)                    | 0.96 (0.68-1.36)                    | 0.88 (0.64-1.21)                    | ---                       |
| Ecuador                     | 0.78 (0.50-1.23)                                      | 0.97 (0.67-1.42)                    | 0.94 (0.67-1.31)                    | 0.99 (0.69-1.41)                    | ---                       |
| Estonia                     | 0.61 (0.33-1.10)                                      | 0.71 (0.38-1.35)                    | 0.67 (0.37-1.19)                    | 0.78 (0.44-1.38)                    | ---                       |
| Ethiopia <sup>a</sup>       | ---                                                   | ---                                 | ---                                 | ---                                 | ---                       |
| Georgia                     | <b>0.48 (0.26-0.90)</b>                               | 0.62 (0.36-1.08)                    | 0.96 (0.55-1.67)                    | 1.06 (0.70-1.62)                    | ---                       |
| Ghana                       | <b>0.11 (0.05-0.24)</b>                               | <b>0.26 (0.13-0.48)</b>             | <b>0.33 (0.19-0.57)</b>             | <b>0.58 (0.37-0.91)</b>             | ---                       |
| Guatemala <sup>c</sup>      | <b>0.17 (0.09-0.36)</b>                               | <b>0.38 (0.23-0.64)</b>             | 0.69 (0.45-1.05)                    | 1.03 (0.74-1.43)                    | ---                       |
| Hungary                     | 1.08 (0.59-1.99)                                      | 1.36 (0.78-2.38)                    | 1.14 (0.66-1.99)                    | 1.59 (0.91-2.80)                    | ---                       |
| India                       | <b>0.26 (0.11-0.58)</b>                               | <b>0.49 (0.26-0.93)</b>             | <b>0.50 (0.26-0.95)</b>             | 1.01 (0.63-1.63)                    | ---                       |
| Kazakhstan                  | <b>0.54 (0.39-0.77)</b>                               | <b>0.57 (0.41-0.79)</b>             | <b>0.70 (0.54-0.92)</b>             | 1.04 (0.77-1.39)                    | ---                       |
| Kenya                       | <b>0.14 (0.08-0.25)</b>                               | <b>0.13 (0.07-0.24)</b>             | <b>0.27 (0.18-0.42)</b>             | 0.43 (0.30-0.63)                    | ---                       |
| Laos                        | <b>0.15 (0.03-0.65)</b>                               | <b>0.27 (0.07-0.95)</b>             | <b>0.22 (0.07-0.67)</b>             | 0.62 (0.31-1.24)                    | ---                       |
| Latvia <sup>b</sup>         | ---                                                   | 1.01 (0.57-1.80)                    | 1.00 (0.54-1.85)                    | 1.00 (0.53-1.92)                    | ---                       |
| Malawi                      | <b>0.35 (0.22-0.56)</b>                               | <b>0.54 (0.38-0.76)</b>             | 0.72 (0.51-1.02)                    | 0.65 (0.47-0.89)                    | ---                       |
| Malaysia                    | 0.77 (0.54-1.10)                                      | 0.87 (0.62-1.22)                    | 0.98 (0.70-1.37)                    | 1.07 (0.79-1.44)                    | ---                       |
| Mali                        | ---                                                   | 0.64 (0.13-3.14)                    | 0.42 (0.08-2.13)                    | 0.80 (0.27-2.39)                    | ---                       |
| Mauritania                  | 1.15 (0.63-2.11)                                      | 1.24 (0.68-2.26)                    | 1.14 (0.68-1.92)                    | 0.90 (0.53-1.53)                    | ---                       |
| Mauritius                   | 1.25 (0.67-2.31)                                      | 1.06 (0.59-1.91)                    | 0.91 (0.56-1.49)                    | 1.00 (0.58-1.72)                    | ---                       |
| Mexico                      | <b>0.70 (0.59-0.83)</b>                               | 1.12 (0.97-1.30)                    | <b>1.19 (1.03-1.37)</b>             | <b>1.34 (1.17-1.54)</b>             | ---                       |

*Socio-economic disparities in obesity and underweight*

|                           |                         |                         |                         |                         |     |
|---------------------------|-------------------------|-------------------------|-------------------------|-------------------------|-----|
| Morocco                   | 0.45 (0.17-1.20)        | 0.77 (0.33-1.80)        | 1.08 (0.56-2.07)        | 1.17 (0.72-1.88)        | --- |
| Myanmar                   | <b>0.14 (0.05-0.43)</b> | <b>0.35 (0.14-0.88)</b> | 0.57 (0.27-1.17)        | 0.50 (0.23-1.09)        | --- |
| Namibia                   | <b>0.19 (0.11-0.33)</b> | <b>0.27 (0.17-0.43)</b> | <b>0.52 (0.34-0.82)</b> | 0.71 (0.48-1.04)        | --- |
| Nepal                     | <b>0.18 (0.05-0.72)</b> | <b>0.25 (0.09-0.72)</b> | <b>0.13 (0.04-0.42)</b> | <b>0.23 (0.09-0.57)</b> | --- |
| Pakistan                  | <b>0.29 (0.17-0.49)</b> | <b>0.25 (0.14-0.45)</b> | <b>0.40 (0.25-0.66)</b> | <b>0.38 (0.25-0.59)</b> | --- |
| Paraguay                  | <b>0.21 (0.14-0.33)</b> | <b>0.35 (0.24-0.51)</b> | <b>0.40 (0.29-0.56)</b> | <b>0.75 (0.56-0.99)</b> | --- |
| Philippines               | <b>0.57 (0.34-0.97)</b> | <b>0.51 (0.32-0.79)</b> | <b>0.68 (0.47-0.99)</b> | 0.88 (0.64-1.21)        | --- |
| Russian Federation        | <b>0.62 (0.39-0.97)</b> | 0.74 (0.50-1.08)        | 0.81 (0.55-1.19)        | 0.90 (0.62-1.30)        | --- |
| Senegal                   | 0.42 (0.13-1.33)        | 0.70 (0.27-1.82)        | 0.54 (0.22-1.34)        | 0.57 (0.30-1.19)        | --- |
| Slovakia <sup>d</sup>     | ---                     | 0.93 (0.53-1.61)        | 0.85 (0.51-1.43)        | 1.06 (0.65-1.72)        | --- |
| Slovenia <sup>c,e</sup>   | 1.99 (0.72-5.51)        | 2.14 (0.84-5.45)        | 1.51 (0.57-3.98)        | 0.73 (0.25-2.14)        | --- |
| South Africa <sup>b</sup> | ---                     | 1.20 (0.71-2.02)        | 1.00 (0.61-1.64)        | 1.14 (0.70-1.85)        | --- |
| Spain                     | <b>2.77 (2.01-3.81)</b> | <b>2.47 (1.84-3.30)</b> | <b>2.14 (1.61-2.85)</b> | <b>1.37 (1.03-1.84)</b> | --- |
| Sri Lanka                 | 1.48 (0.81-2.69)        | 1.21 (0.72-2.03)        | 1.08 (0.67-1.74)        | 0.82 (0.51-1.32)        | --- |
| Swaziland                 | 0.73 (0.47-1.16)        | <b>0.62 (0.39-0.97)</b> | <b>0.66 (0.47-0.94)</b> | <b>0.70 (0.51-0.95)</b> | --- |
| Tunisia                   | <b>0.44 (0.25-0.76)</b> | <b>0.59 (0.37-0.94)</b> | 0.97 (0.67-1.42)        | 1.13 (0.80-1.59)        | --- |
| Turkey <sup>f</sup>       | ---                     | ---                     | ---                     | ---                     | --- |
| Ukraine                   | <b>0.53 (0.32-0.86)</b> | <b>0.46 (0.28-0.76)</b> | 0.71 (0.45-1.13)        | 0.95 (0.60-1.51)        | --- |
| United Arab Emirates      | 1.24 (0.67-2.31)        | 1.71 (0.96-3.06)        | 1.53 (0.86-2.73)        | 0.88 (0.50-1.55)        | --- |
| Uruguay                   | 0.83 (0.63-1.09)        | 1.33 (0.98-1.82)        | 1.35 (0.95-1.93)        | 0.96 (0.72-1.29)        | --- |
| Vietnam                   | ---                     | ---                     | ---                     | ---                     | --- |
| Zambia <sup>c</sup>       | <b>0.29 (0.13-0.61)</b> | <b>0.27 (0.14-0.54)</b> | 0.62 (0.36-1.06)        | 0.61 (0.37-1.03)        | --- |
| Zimbabwe                  | <b>0.38 (0.24-0.62)</b> | <b>0.47 (0.29-0.74)</b> | <b>0.38 (0.24-0.59)</b> | 0.70 (0.47-1.05)        | --- |

\*Indicates significance ( $p < 0.05$ ) of at least one income quintile compared to wealthiest quintile.

Bolded indicates significance ( $p < 0.05$ ).

<sup>a</sup>Income quintiles created sparse cells for regression analyses.

<sup>b</sup>Adjusted using age as a 3-category variable (18-29 years old; 30-49 years old; 50 plus).

<sup>c</sup>Robust standard errors.

<sup>d</sup>Adjusted using age as continuous variable.

<sup>e</sup>Unadjusted for urbanicity.

<sup>f</sup>Unadjusted for income.
